# Supplementary material for: GRID-independent molecular descriptor analysis and molecular docking studies to mimic the binding hypothesis of γ-aminobutyric acid transporter 1 (GAT1) inhibitors
Source: PeerJ. 2019 Jan 31;7:e6283. doi: 10.7717/peerj.6283 (PMC6360079; doi:10.7717/peerj.6283)
Supplement: Supplemental Information 10 [file peerj-07-6283-s010.xlsx]

## Sheet: DataSet
Compound Code	Names	SMILEs	classes	Activity (IC50 µM)	References	Substrate/Inhibitor	Set	Mol. Weight (< 150 not considered for PLS model)
2	(3R)-1-[4,4-bis(3-methylthiophen-2-yl)but-3-enyl]piperidine-3-carboxylic acid	s1ccc(C)c1C(=CCCN1C[C@@H](CCC1)C(O)=O)c1sccc1C	A	0.049	1	inhibitor	Training	375.557
6	(1R,3R)-1-[4,4-bis[3-(phenoxymethyl)-2-thienyl]but-3-enyl]piperidine-3-carboxylic acid	s1ccc(COc2ccccc2)c1C(=CCCN1C[C@@H](CCC1)C(O)=O)c1sccc1COc1ccccc1	A	0.34	2	inhibitor	Training	559.751
8	(1R,2R)-1-[4,4-bis[3-(phenoxymethyl)-2-thienyl]but-3-enyl]piperidine-2-carboxylic acid	s1ccc(COc2ccccc2)c1C(=CCCN1CCCCC1C(O)=O)c1sccc1COc1ccccc1	A	0.65	2	inhibitor	Training	559.751
9	(1R,3R)-1-[4,4-bis[3-(cyclohexoxymethyl)-2-thienyl]but-3-enyl]piperidine-3-carboxylic acid	s1ccc(COC2CCCCC2)c1C(=CCCN1C[C@@H](CCC1)C(O)=O)c1sccc1COC1CCCCC1	A	0.68	2	inhibitor	Training	571.847
10	(1R,3R)-1-[4,4-bis[3-(benzyloxymethyl)-2-thienyl]but-3-enyl]piperidine-3-carboxylic acid	s1ccc(COC2CCCCC2)c1C(=CCCN1C[C@@H](CCC1)C(O)=O)c1sccc1COC1CCCCC1	A	0.84	2	inhibitor	Training	587.805
11	(1R,2R)-1-[4,4-bis[3-(cyclohexoxymethyl)-2-thienyl]but-3-enyl]piperidine-2-carboxylic acid	s1ccc(COC2CCCCC2)c1C(=CCCN1CCCCC1C(O)=O)c1sccc1COC1CCCCC1	A	0.94	2	inhibitor	Training	571.847
12	1-[4,4-bis[3-(cyclohexoxymethyl)-2-thienyl]but-3-enyl]piperidine-4-carboxylic acid	s1ccc(COC2CCCCC2)c1C(=CCCN1CCCCC1C(O)=O)c1sccc1COC1CCCCC1	A	1.24	2	inhibitor	Training	571.847
13	(1R,2R)-1-[4,4-bis(3-methyl-2-thienyl)but-3-enyl]piperidine-2-carboxylic acid	s1ccc(C)c1C(=CCCN1CCCCC1C(O)=O)c1sccc1C	A	1.36	2	inhibitor	Training	375.557
15	1-[4,4-bis[3-(phenoxymethyl)-2-thienyl]but-3-enyl]piperidine-4-carboxylic acid	s1ccc(COc2ccccc2)c1C(=CCCN1CCC(CC1)C(O)=O)c1sccc1COc1ccccc1	A	1.5	2	inhibitor	Training	559.751
18	(1R,3R)-1-[4,4-bis[3-(methoxymethyl)-2-thienyl]but-3-enyl]piperidine-3-carboxylic acid	s1ccc(COC)c1C(=CCCN1C[C@@H](CCC1)C(O)=O)c1sccc1COC	A	2.8	2	inhibitor	Training	435.609
22	1-[4,4-bis[3-(benzyloxymethyl)-2-thienyl]but-3-enyl]piperidine-4-carboxylic acid	s1ccc(COCc2ccccc2)c1C(=CCCN1CCC(CC1)C(O)=O)c1sccc1COCc1ccccc1	A	4.34	2	inhibitor	Training	587.805
28	(1R,3R)-1-[4,4-bis[3-(isopropoxymethyl)-2-thienyl]but-3-enyl]piperidine-3-carboxylic acid	s1ccc(COC(C)C)c1C(=CCCN1C[C@@H](CCC1)C(O)=O)c1sccc1COC(C)C	A	7.1	2	inhibitor	Training	491.717
31	(1R,2R)-1-[4,4-bis[3-(methoxymethyl)-2-thienyl]but-3-enyl]piperidine-2-carboxylic acid	s1ccc(COC)c1C(=CCCN1CCCCC1C(O)=O)c1sccc1COC	A	12.3	2	inhibitor	Training	435.609
35	(1R,2R)-1-[4,4-bis[3-(benzyloxymethyl)-2-thienyl]but-3-enyl]piperidine-2-carboxylic acid	s1ccc(COCc2ccccc2)c1C(=CCCN1CCCCC1C(O)=O)c1sccc1COCc1ccccc1	A	27.6	2	inhibitor	Training	587.805
42	(1R,3R)-1-[4,4-bis[3-(1-naphthyloxymethyl)-2-thienyl]but-3-enyl]piperidine-3-carboxylic acid	s1ccc(COc2c3c(ccc2)cccc3)c1C(=CCCN1C[C@@H](CCC1)C(O)=O)c1sccc1COc1c2c(ccc1)cccc2	A	66.3	2	inhibitor	Training	659.871
14	(1S,3R)-1-(2-trityloxyethyl)piperidine-3-carboxylic acid	O(C(c1ccccc1)(c1ccccc1)c1ccccc1)CCN1CC(CCC1)C(O)=O	B	1.4	3	inhibitor	Training	415.533
20	(1S,3R)-1-[2-(9-phenylfluoren-9-yl)oxyethyl]piperidine-3-carboxylic acid	O(CCN1CC(CCC1)C(O)=O)C1(c2c(-c3c1cccc3)cccc2)c1ccccc1	B	3	3	inhibitor	Training	413.517
25	(1S,3R)-1-[2-(9-phenylxanthen-9-yl)oxyethyl]piperidine-3-carboxylic acid	O1c2c(cccc2)C(OCCN2CC(CCC2)C(O)=O)(c2c1cccc2)c1ccccc1	B	5	3	inhibitor	Training	429.516
27	(1S,3R)-1-[2-[(4-methoxyphenyl)-diphenyl-methoxy]ethyl]piperidine-3-carboxylic acid	O(C)c1ccc(cc1)C(OCCN1CC(CCC1)C(O)=O)(c1ccccc1)c1ccccc1	B	6.9	3	inhibitor	Training	445.559
30	(1S,3R)-1-[2-[(R)-(3-fluoro-4-methoxy-phenyl)-(3-fluorophenyl)-phenyl-methoxy]ethyl]piperidine-3-carboxylic acid	Fc1cc(ccc1OC)C(OCCN1CC(CCC1)C(O)=O)(c1cc(F)ccc1)c1ccccc1	B	10	3	inhibitor	Training	481.539
32	(1S,3R)-1-[2-[bis(4-fluorophenyl)-(4-methoxyphenyl)methoxy]ethyl]piperidine-3-carboxylic acid	Fc1ccc(cc1)C(OCCN1CC(CCC1)C(O)=O)(c1ccc(OC)cc1)c1ccc(F)cc1	B	19	3	inhibitor	Training	481.539
36	(1R,3R)-1-[2-[tris(4-methoxyphenyl)methoxy]ethyl]piperidine-3-carboxylic acid	O(C)c1ccc(cc1)C(OCCN1CC(CCC1)C(O)=O)(c1ccc(OC)cc1)c1ccc(OC)cc1	B	30	4	inhibitor	Training	505.611
38	(1S,3R)-1-[2-[2-(5,6-dihydrobenzo[b][1]benzazepin-11-yl)ethoxy]ethyl]piperidine-3-carboxylic acid	O(CCN1C[C@@H](CCC1)C(O)=O)CCN1c2c(CCc3c1cccc3)cccc2	B	39.8107	5	inhibitor	Training	394.515
39	(1S,3R)-1-(2-tritylsulfanylethyl)piperidine-3-carboxylic acid	S(C(c1ccccc1)(c1ccccc1)c1ccccc1)CCN1CC(CCC1)C(O)=O	B	43	3	inhibitor	Training	431.6
40	(1S,3R)-1-[2-[bis(4-methoxyphenyl)-phenyl-methoxy]ethyl]piperidine-3-carboxylic acid	O(C)c1ccc(cc1)C(OCCN1CC(CCC1)C(O)=O)(c1ccc(OC)cc1)c1ccccc1	B	43	3	inhibitor	Training	475.585
41	(1S,3R)-1-[2-[tris(4-fluorophenyl)methoxy]ethyl]piperidine-3-carboxylic acid	Fc1ccc(cc1)C(OCCN1CC(CCC1)C(O)=O)(c1ccc(F)cc1)c1ccc(F)cc1	B	58	3	inhibitor	Training	469.503
43	(1S,3R)-1-[2-[(R)-[4-methoxy-3-(trifluoromethyl)phenyl]-phenyl-[3-(trifluoromethyl)phenyl]methoxy]ethyl]piperidine-3-carboxylic acid	FC(F)(F)c1cc(ccc1OC)C(OCCN1CC(CCC1)C(O)=O)(c1cc(ccc1)C(F)(F)F)c1ccccc1	B	73	3	inhibitor	Training	581.553
44	(1R,3R)-1-[2-[tris(4-methoxyphenyl)methylsulfanyl]ethyl]piperidine-3-carboxylic acid	S(C(c1ccc(OC)cc1)(c1ccc(OC)cc1)c1ccc(OC)cc1)CCN1CC(CCC1)C(O)=O	B	78	3	inhibitor	Training	521.678
75	(1R,3R)-1-[2-[(E)-2-[5-fluoro-2-(3-fluorobenzoyl)phenyl]vinyloxy]ethyl]piperidine-3-carboxylic acid	Fc1cc(\C=C/OCCN2CC(CCC2)C(O)=O)c(cc1)C(=O)c1cc(F)ccc1	B	29.51	6	inhibitor	Training	415.436
76	(1R,3R)-1-[2-[(Z)-2-[4-fluoro-2-[(4-fluorophenyl)methyl]phenyl]vinyloxy]ethyl]piperidine-3-carboxylic acid	F)cc2)c(cc1)\C=C\OCCN1CC(CCC1)C(O)=O	B	1.17	6	inhibitor	Training	401.453
77	(1R,3R)-1-[2-[(Z)-2-[5-fluoro-2-[(4-fluorophenyl)methyl]phenyl]vinyloxy]ethyl]piperidine-3-carboxylic acid	Fc1cc(\C=C\OCCN2CC(CCC2)C(O)=O)c(cc1)Cc1ccc(F)cc1	B	1.09	6	inhibitor	Training	401.453
78	(1R,3R)-1-[2-[(Z)-2-[5-fluoro-2-[(2-fluorophenyl)methyl]phenyl]vinyloxy]ethyl]piperidine-3-carboxylic acid	Fc1ccccc1Cc1ccc(F)cc1\C=C\OCCN1CC(CCC1)C(O)=O	B	0.3	6	inhibitor	Training	401.453
94	(1R,3R)-1-[2-[(Z)-2-[4-fluoro-2-(2-fluorobenzoyl)phenyl]vinyloxy]ethyl]piperidine-3-carboxylic acid	Fc1ccccc1C(=O)c1cc(F)ccc1\C=C\OCCN1CC(CCC1)C(O)=O	B	10.71	6	inhibitor	Test	415.436
95	(1R,3R)-1-[2-[(Z)-2-[4-fluoro-2-(2-fluorobenzoyl)phenyl]vinyloxy]ethyl]piperidine-3-carboxylic acid	Fc1ccccc1C(=O)c1cc(F)ccc1\C=C\OCCN1CC(CCC1)C(O)=O	B	0.75	6	inhibitor	Test	415.436
96	(1R,3R)-1-[2-[(E)-2-[4-fluoro-2-[(2-fluorophenyl)methyl]phenyl]vinyloxy]ethyl]piperidine-3-carboxylic acid	Fc1ccccc1Cc1cc(F)ccc1\C=C/OCCN1CC(CCC1)C(O)=O	B	2.69	6	inhibitor	Test	401.453
97	(1R,3R)-1-[2-[(Z)-2-[4-fluoro-2-[(2-fluorophenyl)methyl]phenyl]vinyloxy]ethyl]piperidine-3-carboxylic acid	Fc1ccccc1Cc1cc(F)ccc1\C=C\OCCN1CC(CCC1)C(O)=O	B	0.63	6	inhibitor	Test	401.453
98	(1R,3R)-1-[2-[(E)-2-[5-fluoro-2-[(4-fluorophenyl)methyl]phenyl]vinyloxy]ethyl]piperidine-3-carboxylic acid	Fc1cc(\C=C/OCCN2CC(CCC2)C(O)=O)c(cc1)Cc1ccc(F)cc1	B	8.91	6	inhibitor	Test	401.453
99	(1R,3R)-1-[2-[(Z)-2-[5-fluoro-2-[(3-fluorophenyl)methyl]phenyl]vinyloxy]ethyl]piperidine-3-carboxylic acid	Fc1cc(\C=C\OCCN2CC(CCC2)C(O)=O)c(cc1)Cc1cc(F)ccc1	B	0.3	6	inhibitor	Test	401.453
1	(1R)-1-[2-(benzhydrylideneamino)oxyethyl]-3,6-dihydro-2H-pyridine-5-carboxylic acid	O(N=C(c1ccccc1)c1ccccc1)CCN1CC(=CCC1)C(O)=O	C	0.04	7	inhibitor	Training	350.418
3	(1R)-1-(4,4-diphenylbut-3-enyl)-3,6-dihydro-2H-pyridine-5-carboxylic acid	c1ccc(cc1)C(=CCCN2CCC=C(C2)C(=O)O)c3ccccc3	C	0.2	8	inhibitor	Training	333.431
4	(1S)-1-[2-[bis[4-(trifluoromethyl)phenyl]methoxy]ethyl]-3,6-dihydro-2H-pyridine-5-carboxylic acid	FC(F)(F)c1ccc(cc1)C(OCCN1CC(=CCC1)C(O)=O)c1ccc(cc1)C(F)(F)F	C	0.26	3	inhibitor	Training	473.413
79	(1R,3R)-1-[5-(N-phenylanilino)pentyl]piperidine-3-carboxylic acid	OC(=O)[C@@H]1CCCN(C1)CCCCCN(c1ccccc1)c1ccccc1	C	4.9	9	inhibitor	Training	366.505
80	(1R,3R)-1-[7-(N-phenylanilino)heptyl]piperidine-3-carboxylic acid	OC(=O)[C@@H]1CCCN(C1)CCCCCCCN(c1ccccc1)c1ccccc1	C	4.2	9	inhibitor	Training	394.559
81	(1R,3R)-1-[2-[2-(N-phenylanilino)ethoxy]ethyl]piperidine-3-carboxylic acid	O(CCN1C[C@@H](CCC1)C(O)=O)CCN(c1ccccc1)c1ccccc1	C	1.3	9	inhibitor	Training	368.477
101	(1S,3S)-1-[2-[bis(4-methoxyphenyl)methoxy]ethyl]piperidine-3-carboxylic acid	O(C)c1ccc(cc1)C(OCCN1CC(CCC1)C(O)=O)c1ccc(OC)cc1	C	35	9	inhibitor	Test	399.487
37	(5S)-5-(4,4-diphenylbut-3-enyl)-6,7-dihydro-4H-isoxazolo[4,5-c]pyridin-3-one	O1NC(=O)C2=C1CCN(C2)CCC=C(c1ccccc1)c1ccccc1	C	38	12	inhibitor	Training	346.43
84	(1R,3R)-1-(4,4-diphenylbut-3-enyl)piperidine-3-carboxylic acid	OC(=O)C1CCCN(C1)CCC=C(c1ccccc1)c1ccccc1	C	0.11	15	inhibitor	Test	335.447
102	(1R,3R)-1-[8-(N-phenylanilino)octyl]piperidine-3-carboxylic acid	OC(=O)[C@@H]1CCCN(C1)CCCCCCCCN(c1ccccc1)c1ccccc1	C	12	9	inhibitor	Test	408.586
5	(1S,3R)-1-[2-(2-phenothiazin-10-ylethoxy)ethyl]piperidine-3-carboxylic acid	S1c2c(N(c3c1cccc3)CCOCCN1C[C@@H](CCC1)C(O)=O)cccc2	M	0.309	5	inhibitor	Training	398.527
7	(1S,3R)-1-[2-(2-benzo[b][1]benzazepin-11-ylethoxy)ethyl]piperidine-3-carboxylic acid	O(CCN1C[C@@H](CCC1)C(O)=O)CCN1c2c(C=Cc3c1cccc3)cccc2	M	0.6457	5	inhibitor	Training	392.499
16	(4R)-4-[4,4-bis(3-methyl-2-thienyl)but-3-enylamino]-4,5,6,7-tetrahydro-1,2-benzoxazol-3-ol	s1ccc(C)c1C(=CCCNC1c2c(onc2O)CCC1)c1sccc1C	M	2	7	inhibitor	Training	400.567
17	(E,2S)-2-[(2S)-azetidin-2-yl]-6,6-bis(3-methyl-2-thienyl)hex-3-enoic acid	s1ccc(C)c1C(CC=CC(C(O)=O)C1NCC1)c1sccc1C	M	2.01	8	inhibitor	Training	361.53
19	(E,2R)-2-[(2R)-azetidin-2-yl]-6,6-diphenyl-hex-3-enoic acid	OC(=O)C(C=CCC(c1ccccc1)c1ccccc1)C1NCC1	M	2.83	8	inhibitor	Training	321.42
21	(4R)-4-[4,4-bis(3-methyl-2-thienyl)but-3-enyl-methyl-amino]-4,5,6,7-tetrahydro-1,2-benzoxazol-3-ol	s1ccc(C)c1C(=CCCN(C)[C@H]1c2c(onc2O)CCC1)c1sccc1C	M	4	7	inhibitor	Training	414.594
23	(E)-4-aminobut-2-enoic acid	OC(=O)\C=C\CN	M	5	10	inhibitor	Training	101.105
24	Gamma aminobutyric acid (GABA)	OC(=O)CCCN	M	5	3	substrate	Training	103.121
26	(3R)-piperidine-3-carboxylic acid	OC(=O)[C@@H]1CCCNC1	M	5.9	1	inhibitor	Training	129.159
29	(Z)-3-[(E)-hydrazinylidenemethyl]sulfanylprop-2-enoic acid	S(\C=C\C(O)=O)\C=N\N	M	9.5	10	inhibitor	Training	146.17
33	(3R,4R)-3,4-bis(1,3-benzodioxol-5-ylmethyl)tetrahydrofuran-2-one	O1C[C@H](Cc2cc3OCOc3cc2)[C@@H](Cc2cc3OCOc3cc2)C1=O	M	20.6	11	inhibitor	Training	354.358
34	N,N-dimethyl-2-[(1R,2R,4R)-1,7,7-trimethyl-2-phenyl-norbornan-2-yl]oxy-ethanamine	O(CCN(C)C)C1(CC2CCC1(C)C2(C)C)c1ccccc1	M	26	3	inhibitor	Training	301.474
45	(E)-4-aminobut-2-enoic acid	OC(=O)\C=C\CN	M	3.3	10	inhibitor	Training	101.105
46	(E)-3-carbamimidoylsulfanylprop-2-enoic acid	S(C=CC(O)=O)C(N)=N	M	9.5	10	inhibitor	Training	146.17
47	(1R,2R,4R)-1-(4,4-diphenylbut-3-enyl)-4-hydroxy-pyrrolidine-2-carboxylic acid	O[C@@H]1C[C@@H](N(C1)CCC=C(c1ccccc1)c1ccccc1)C(O)=O	M	9.4	13	inhibitor	Training	337.419
48	(1R,2S,4S)-1-(4,4-diphenylbut-3-enyl)-4-hydroxy-pyrrolidine-2-carboxylic acid	O[C@H]1CC(N(C1)CCC=C(c1ccccc1)c1ccccc1)C(O)=O	M	4.92	13	inhibitor	Training	337.419
49	(1R,2R,4S)-1-(4,4-diphenylbut-3-enyl)-4-hydroxy-pyrrolidine-2-carboxylic acid	O[C@H]1C[C@@H](N(C1)CCC=C(c1ccccc1)c1ccccc1)C(O)=O	M	3.29	13	inhibitor	Training	337.419
50	(1R,2R,4S)-1-[4,4-bis(2-thienyl)but-3-enyl]-4-hydroxy-pyrrolidine-2-carboxylic acid	s1cccc1C(=CCCN1C[C@@H](O)C[C@@H]1C(O)=O)c1sccc1	M	3.15	13	inhibitor	Training	349.475
51	(1R,2R)-1-(4,4-diphenylbut-3-enyl)azetidine-2-carboxylic acid	OC(=O)[C@@H]1N(CC1)CCC=C(c1ccccc1)c1ccccc1	M	2.83	8	inhibitor	Training	307.393
52	(1S,2S)-1-(4,4-diphenylbut-3-enyl)pyrrolidine-2-carboxylic acid	OC(=O)[C@H]1N(CCC1)CCC=C(c1ccccc1)c1ccccc1	M	7	8	inhibitor	Training	321.42
53	(4R)-4-[[(4S)-4-(3-fluorophenyl)-4-(4-fluorophenyl)butyl]amino]-4,5,6,7-tetrahydro-1,2-benzoxazol-3-ol	Fc1cc(ccc1)C(CCCNC1c2c(onc2O)CCC1)c1ccc(F)cc1	M	4	14	inhibitor	Training	398.453
54	(4R)-4-[[(4R)-4,4-bis(o-tolyl)butyl]amino]-4,5,6,7-tetrahydro-1,2-benzoxazol-3-ol	o1nc(O)c2c1CCCC2NCCCC(c1ccccc1C)c1ccccc1C	M	1.5	14	inhibitor	Training	390.527
55	(4R)-4-[4,4-bis(o-tolyl)but-3-enylamino]-4,5,6,7-tetrahydro-1,2-benzoxazol-3-ol	o1nc(O)c2c1CCCC2NCCC=C(c1ccccc1C)c1ccccc1C	M	10	14	inhibitor	Training	388.511
56	(4R)-4-[3-(10H-anthracen-9-ylidene)propylamino]-4,5,6,7-tetrahydro-1,2-benzoxazol-3-ol	o1nc(O)c2c1CCCC2NCCC=C1c2c(Cc3c1cccc3)cccc2	M	7	14	inhibitor	Training	372.468
57	(4R)-4-(4,4-diphenylbutylamino)-4,5,6,7-tetrahydro-1,2-benzoxazol-3-ol	o1nc(O)c2c1CCCC2NCCCC(c1ccccc1)c1ccccc1	M	4	14	inhibitor	Training	362.473
58	(4R)-4-[3-(9H-thioxanthen-9-yl)propylamino]-4,5,6,7-tetrahydro-1,2-benzoxazol-3-ol	S1c2c(cccc2)C(c2c1cccc2)CCCNC1c2c(onc2O)CCC1	M	5.5	14	inhibitor	Training	392.523
59	(4R)-4-(3-phenothiazin-10-ylpropylamino)-4,5,6,7-tetrahydro-1,2-benzoxazol-3-ol	(N(c3c1cccc3)CCCNC1c3c(onc3O)CCC1)cccc2	M	6	14	inhibitor	Training	393.511
60	(4R)-4-(3,3-diphenylpropylamino)-4,5,6,7-tetrahydro-1,2-benzoxazol-3-ol	o1nc(O)c2c1CCCC2NCCC(c1ccccc1)c1ccccc1	M	1	14	inhibitor	Training	348.446
61	(4R)-4-(4-phenylbutylamino)-4,5,6,7-tetrahydro-1,2-benzoxazol-3-ol	o1nc(O)c2c1CCCC2NCCCCc1ccccc1	M	30	14	inhibitor	Training	286.375
62	(4R)-4-(4,4-diphenylbut-3-enylamino)-4,5,6,7-tetrahydro-1,2-benzoxazol-3-ol	o1nc(O)c2c1CCCC2NCCC=C(c1ccccc1)c1ccccc1	M	6	14	inhibitor	Training	360.457
63	(4R)-4-[4,4-diphenylbut-3-enyl(methyl)amino]-4,5,6,7-tetrahydro-1,2-benzoxazol-3-ol	o1nc(O)c2c1CCCC2N(CCC=C(c1ccccc1)c1ccccc1)C	M	2	14	inhibitor	Training	374.484
64	(4R)-4-[4,4-bis(4-fluorophenyl)butyl-methyl-amino]-4,5,6,7-tetrahydro-1,2-benzoxazol-3-ol	Fc1ccc(cc1)C(CCCN(C)C1c2c(onc2O)CCC1)c1ccc(F)cc1	M	11	14	inhibitor	Training	412.48
65	(4R)-4-[[(4S)-4,4-bis(o-tolyl)butyl]-methyl-amino]-4,5,6,7-tetrahydro-1,2-benzoxazol-3-ol	o1nc(O)c2c1CCCC2N(CCCC(c1ccccc1C)c1ccccc1C)C	M	11	14	inhibitor	Training	404.554
66	(4R)-4-[4,4-bis(o-tolyl)but-3-enyl-methyl-amino]-4,5,6,7-tetrahydro-1,2-benzoxazol-3-ol	o1nc(O)c2c1CCCC2N(CCC=C(c1ccccc1C)c1ccccc1C)C	M	3	14	inhibitor	Training	402.538
67	(4R)-4-[3-(10H-anthracen-9-ylidene)propyl-methyl-amino]-4,5,6,7-tetrahydro-1,2-benzoxazol-3-ol	o1nc(O)c2c1CCCC2N(CCC=C1c2c(Cc3c1cccc3)cccc2)C	M	12	14	inhibitor	Training	386.495
68	(4R)-4-[(3-hydroxy-3,3-diphenyl-propyl)-methyl-amino]-4,5,6,7-tetrahydro-1,2-benzoxazol-3-ol	o1nc(O)c2c1CCCC2N(CCC(O)(c1ccccc1)c1ccccc1)C	M	5	14	inhibitor	Training	378.472
69	(4R)-4-[[3,3-bis(4-fluorophenyl)-3-hydroxy-propyl]-methyl-amino]-4,5,6,7-tetrahydro-1,2-benzoxazol-3-ol	Fc1ccc(cc1)C(O)(CCN(C)C1c2c(onc2O)CCC1)c1ccc(F)cc1	M	12	14	inhibitor	Training	414.452
70	(4R)-4-[4,4-bis(5-methyl-2-thienyl)but-3-enyl-methyl-amino]-4,5,6,7-tetrahydro-1,2-benzoxazol-3-ol	s1c(ccc1C)C(=CCCN(C)C1c2c(onc2O)CCC1)c1sc(cc1)C	M	7	14	inhibitor	Training	414.594
71	(4R)-4-[4,4-bis(5-methyl-2-thienyl)but-3-enyl-methyl-amino]-4,5,6,7-tetrahydro-1,2-benzoxazol-3-ol	s1c(ccc1C)C(=CCC[N@@](C)C1c2c(onc2O)CCC1)c1sc(cc1)C	M	4	14	inhibitor	Training	414.594
72	2-[(1R,2S)-1-(4,4-diphenylbut-3-enyl)pyrrolidin-2-yl]acetic acid	OC(=O)C[C@H]1N(CCC1)CCC=C(c1ccccc1)c1ccccc1	M	0.396	15	inhibitor	Training	335.447
73	2-[(1R,2R)-1-(4,4-diphenylbut-3-enyl)pyrrolidin-2-yl]acetic acid	OC(=O)C[C@@H]1N(CCC1)CCC=C(c1ccccc1)c1ccccc1	M	3.05	15	inhibitor	Training	335.447
74	3-[(1S,2S)-1-[4,4-bis(3-methyl-2-thienyl)but-3-enyl]pyrrolidin-2-yl]propanoic acid	s1ccc(C)c1C(=CCCN1CCC[C@H]1CCC(O)=O)c1sccc1C	M	5.29	15	inhibitor	Training	389.584
82	(1R,3R)-1-[2-(phenothiazin-10-ylmethoxy)ethyl]piperidine-3-carboxylic acid	S1c2c(N(c3c1cccc3)COCCN1C[C@@H](CCC1)C(O)=O)cccc2	M	1.9	16	inhibitor	Training	384.5
83	(1R,3S)-1-[2-[[2-(trifluoromethyl)phenothiazin-10-yl]methoxy]ethyl]piperidine-3-carboxylic acid	S1c2c(N(c3c1cccc3)COCCN1C[C@@H](CCC1)C(O)=O)cc(cc2)C(F)(F)F	M	1.9	16	inhibitor	Training	452.497
85	(1R,2S,4S)-1-[4,4-bis(2-thienyl)but-3-enyl]-4-hydroxy-pyrrolidine-2-carboxylic acid	s1cccc1C(=CCCN1C[C@@H](O)C[C@H]1C(O)=O)c1sccc1	M	5.14	13	inhibitor	Test	349.475
86	(1R,2S,4R)-1-[4,4-bis(2-thienyl)but-3-enyl]-4-hydroxy-pyrrolidine-2-carboxylic acid	s1cccc1C(=CCCN1C[C@H](O)C[C@H]1C(O)=O)c1sccc1	M	6.56	13	inhibitor	Test	349.475
87	(1R,2R)-1-[4,4-bis(3-methyl-2-thienyl)but-3-enyl]azetidine-2-carboxylic acid	s1ccc(C)c1C(=CCCN1CC[C@@H]1C(O)=O)c1sccc1C	M	2.01	8	inhibitor	Test	347.503
88	(1S,2S)-1-[4,4-bis(3-methyl-2-thienyl)but-3-enyl]pyrrolidine-2-carboxylic acid	s1ccc(C)c1C(=CCCN1CCC[C@H]1C(O)=O)c1sccc1C	M	0.343	8	inhibitor	Test	361.53
89	(1R,2S)-1-(4,4-diphenylbut-3-enyl)pyrrolidine-2-carboxylic acid	OC(=O)[C@H]1N(CCC1)CCC=C(c1ccccc1)c1ccccc1	M	2.56	15	inhibitor	Test	321.42
90	(1R,2R)-1-(4,4-diphenylbut-3-enyl)pyrrolidine-2-carboxylic acid	OC(=O)[C@@H]1N(CCC1)CCC=C(c1ccccc1)c1ccccc1	M	2.97	15	inhibitor	Test	321.42
91	2-[(1R,2S)-1-[4,4-bis(3-methyl-2-thienyl)but-3-enyl]pyrrolidin-2-yl]acetic acid	s1ccc(C)c1C(=CCCN1CCC[C@H]1CC(O)=O)c1sccc1C	M	0.343	15	inhibitor	Test	375.557
92	2-[(1R,2R)-1-[4,4-bis(3-methyl-2-thienyl)but-3-enyl]pyrrolidin-2-yl]acetic acid	s1ccc(C)c1C(=CCCN1CCC[C@@H]1CC(O)=O)c1sccc1C	M	0.875	15	inhibitor	Test	375.557
93	3-[(1S,2S)-1-(4,4-diphenylbut-3-enyl)pyrrolidin-2-yl]propanoic acid	OC(=O)CC[C@H]1N(CCC1)CCC=C(c1ccccc1)c1ccccc1	M	23.9	15	inhibitor	Test	349.474
100	(4S)-4-(4-phenylbutylamino)-4,5,6,7-tetrahydro-1,2-benzoxazol-3-ol	o1nc(O)c2c1CCCC2NCCCCc1ccccc1	M	7	16	inhibitor	Test	286.375

## Sheet: References
Code	Journal	Title	Authors	Year	Volume	First Page	Last Page	Issue
1	Bioorganic & medicinal chemistry	Cyclopropane-based conformational restriction of GABA by a stereochemical diversity-oriented strategy: Identification of an efficient lead for potent inhibitors of GABA transports	Nakada, K., et al.	2013	21	4938	4950	17
2	Bioorganic & medicinal chemistry letters	Design, synthesis, and biological evaluation of the N-diarylalkenyl-piperidinecarboxylic acid derivatives as GABA uptake inhibitors (I)	Zheng, J., et al.	2006	16	225	227	1
3	Journal of medicinal chemistry	Design, synthesis and evaluation of substituted triarylnipecotic acid derivatives as GABA uptake inhibitors: identification of a ligand with moderate affinity and selectivity for the cloned human GABA transporter GAT-3	Dhar, T.M., et al.	1994	37	2334	2342	15
4	Cellular and molecular life sciences	Role of the conserved glutamine 291 in the rat γ-aminobutyric acid transporter rGAT-1	Mari, SA., et al.	2006	63	100	111	1
5	European journal of medicinal chemistry	Synthesis of N-substituted acyclic β-amino acids and their investigation as GABA uptake inhibitors	Sitka, I., et al.	2013	65	487	499
6	Bioorganic & medicinal chemistry	Synthesis and evaluation of N-substituted nipecotic acid derivatives with an unsymmetrical bis-aromatic residue attached to a vinyl ether spacer as potential GABA uptake inhibitors	Quandt, G., et al.	2013	21	3363	3378	11
7	British journal of pharmacology	Guide to receptors and channels (GRAC)	Alexander, S.P., et al.	2011	164	S1	S2
8	European journal of medicinal chemistry	Azetidine derivatives as novel γ-aminobutyric acid uptake inhibitors: Synthesis, biological evaluation, and structure–activity relationship	Faust, M.R., et al.	2010	45	2453	2466	6
9	Advances in pharmacology	Structure–Activity Relationship and Pharmacology of γ‐Aminobutyric Acid (GABA) Transport Inhibitors	Clausen, R.P., et al.	2006	54	265	284
10	European journal of pharmacology	Novel parent structures for inhibitors of the murine GABA transporters mGAT3 and mGAT4	Kragler, A., et al.	2005	519	43	47	1
11	Journal of natural products	The lignan (−)-hinokinin displays modulatory effects on human monoamine and GABA transporter activities	Timple JMV., et el.	2013	76	1889	1895	10
12	Neurochemical research	Pharmacological and functional characterization of astrocytic GABA transport: a short review	Schousboe, A.	2000	25	1241	1244	9
13	European Journal of Medicinal Chemistry	Synthesis and biological evaluation of new GABA-uptake inhibitors derived from proline and from pyrrolidine-2-acetic acid	Zhao et al.	2005	40	231	247	3
14	Bioorganic & medicinal chemistry	Selective inhibitors of GABA uptake: synthesis and molecular pharmacology of 4-N-methylamino-4, 5, 6, 7-tetrahydrobenzo [d] isoxazol-3-ol analogues	Clausen RP et al.,	2005	13	895	908	3
15	European journal of medicinal chemistry	New highly potent GABA uptake inhibitors selective for GAT-1 and GAT-3 derived from (R)-and (S)-proline and homologous pyrrolidine-2-alkanoic acids	Fülep, G.H., et al.	2006	41	809	824	7
16	European journal of pharmacology	Role of the betaine/GABA transporter (BGT-1/GAT2) for the control of epilepsy	Schousboe A., et al.	204	500	281	287	1
